# Supplementary material for: Fabrication of superhydrophobic fabrics with outstanding self-healing performance in sunlight
Source: Royal Society of Chemistry journal article supplement (doi:10.1039/c8qm00607e), 2019-01-01
Supplement: c8qm00607e1.pdf [file c8qm00607e1.pdf]

## Supporting Information

### **Fabrication of superhydrophobic fabrics with outstanding self-healing performance in sun lights**

Jin Zhang, <sup>\*a</sup> Jianguo Zhao,<sup>a</sup> Wenshan Qu,<sup>a</sup> and Zhenxing Wang<sup>\*b</sup>

<sup>a</sup> *Institute of Carbon Materials Science, Shanxi Datong University, Datong, Shanxi Province, 037009, PR China*

<sup>b</sup> *Department of Chemistry, Nanchang University, Nanchang 330031, P. R. China,*

*E-mail: wzx\_1009@163.com*

### **Table of Contents:**

**Video 1:** The fabric-(ODA@PDA) can float on water, and an air cushion can be observed.

**Video 2:** A water droplet can bounce off the fabric surface and rapidly roll off the surface.

**Video 3:** A jet of water with high speed can easily bounce on the fabric.

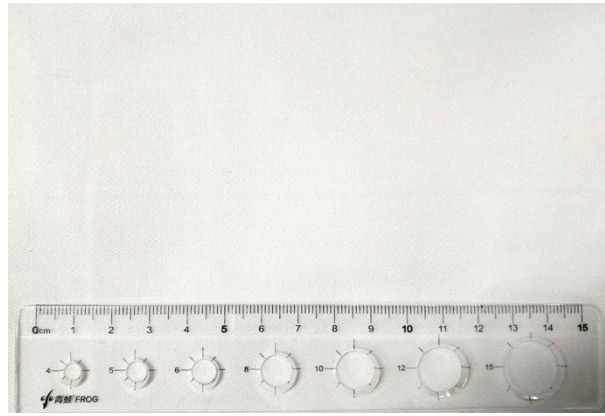

**Fig. S1** The photo image of the pristine fabric.

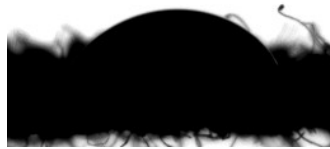

**Fig. S2** The water contact angle of the pristine fabric. The water contact angle of the fabric is about 46°.

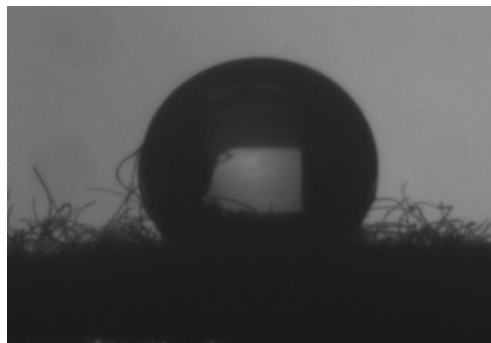

**Fig. S3** The water contact angle of the fabric-(ODA@PDA) (after plasma treatment) at room temperature for one week without sun lights illumination.

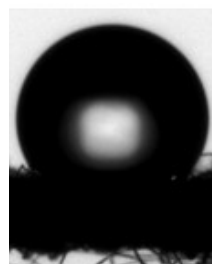

**Fig. S4** The water contact angle of the fabric-(ODA@PDA) after washing (the fabric was dried under room temperature).
